# Supplementary material for: A twisted phenanthroimidazole based molecule with high triplet energy as a host material for high efficiency phosphorescent OLEDs
Source: Royal Society of Chemistry journal article supplement (doi:10.1039/c8tc04218g), 2018-01-01
Supplement: c8tc04218g1.pdf [file c8tc04218g1.pdf]

## Electronic Supplementary Information

### **Twisted phenanthroimidazole based molecule with high triplet energy as host material for high efficiency phosphorescent OLEDs**

Chenglong Li, Zhiqiang Li, Jixiong Liang, Hao Luo, Yu Liu, Yu Liu, Jinbei Wei\* and Yue  
Wang\*

State Key Laboratory of Supramolecular Structure and Materials, College of Chemistry, Jilin  
University, Changchun 130012, P. R. China.

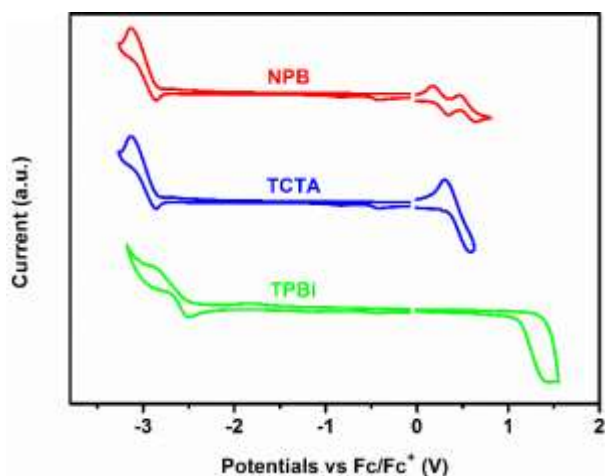

**Fig. S1** Cyclic voltammogram curves of NPB, TCTA and TPBi measured in CH<sub>2</sub>Cl<sub>2</sub> for oxidation and THF for reduction.

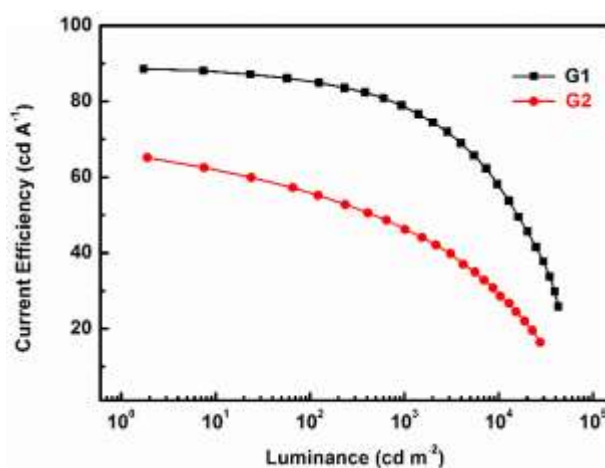

**Fig. S2** Current efficiencies versus luminance curves of device G1 and G2.

The EQE values were calculated based on the following equations:

$$EQE = \pi \frac{\text{Photo Radiance}}{\text{Current Density} \times 6.25 \times 10^{18}}$$

Photon Radiance: photo per second per square centimeter per steradian

Current density: amp per square centimeter (amp: coulomb per second, 1 coulomb = 6.25×10<sup>18</sup> electron)
